# Supplementary material for: Validation of the Ukrainian Prolonged Grief Assessment for Children (PGA-C) in a Wartime Context
Source: Research Square preprint supplement (doi:10.21203/rs.3.rs-10008196/v1), 2026-07-20
Supplement: Supplementary file 1 [file 4da39f11289d0c39f8c26bc0.docx]

**Appendix A**

**Table A1. Symptoms of Prolonged Grief Descriptive Statistics**

| **Items** | | **Mean** | | | **Median** | | | **SD** | | | **Skewness** | | | | **Kurtosis** | | | | **Shapiro-Wilk p** | | |
| --- | --- | --- | --- | --- | --- | --- | --- | --- | --- | --- | --- | --- | --- | --- | --- | --- | --- | --- | --- | --- | --- |
| **N=129** | **N=47** | **N=82** | **N=129** | **N=47** | **N=82** | **N=129** | **N=47** | **N=82** | **N=129** | **N=47** | **N=82** | **N=129** | | **N=47** | **N=82** | **N=129** | | **N=47** | **N=82** |
| Male | Female | Male | Female | Male | Female | Male | Female | Male | Female | Male | Female |
| **Yearning** | **B1** | 3.49 | 3.43 | 3.52 | 4.00 | 4.00 | 4.00 | 1.13 | 1.17 | 1.11 | -0.331 | -0.149 | -0.448 | -0.928 | | -1.230 | -0.681 | <.001 | | <.001 | <.001 |
| **Preoccupation - deceased** | **B2A** | 3.48 | 3.45 | 3.50 | 4.00 | 3.00 | 4.00 | 1.11 | 1.16 | 1.09 | -0.245 | -0.085 | -0.350 | -0.974 | | -1.140 | -0.837 | <.001 | | <.001 | <.001 |
| **Preoccupation - manner of death** | **B3A** | 2.93 | 2.89 | 2.95 | 3.00 | 3.00 | 3.00 | 1.16 | 1.11 | 1.20 | 0.199 | 0.318 | 0.140 | -0.747 | | -0.818 | -0.707 | <.001 | | <.001 | <.001 |
| **Preoccupation - manner of death** | **B3B** | 2.57 | 2.60 | 2.56 | 3.00 | 2.00 | 3.00 | 0.99 | 1.06 | 0.96 | 0.062 | 0.315 | -0.135 | -0.853 | | -0.861 | -0.884 | <.001 | | <.001 | <.001 |
| **Identity Disruption** | **C1** | 3.12 | 3.11 | 3.13 | 3.00 | 3.00 | 3.00 | 1.15 | 1.01 | 1.23 | 0.003 | 0.047 | -0.020 | -0.565 | | 0.166 | -0.821 | <.001 | | <.001 | <.001 |
| **Disbelief** | **C2** | 3.01 | 3.06 | 2.98 | 3.00 | 3.00 | 3.00 | 1.39 | 1.42 | 1.38 | 0.252 | 0.121 | 0.335 | -1.190 | | -1.290 | -1.110 | <.001 | | <.001 | <.001 |
| **Avoidance** | **C3** | 2.29 | 2.32 | 2.28 | 2.00 | 2.00 | 2.00 | 1.13 | 1.18 | 1.11 | 0.864 | 0.991 | 0.792 | 0.059 | | 0.269 | -0.027 | <.001 | | <.001 | <.001 |
| **Emotional pain** | **C4A** | 3.18 | 3.19 | 3.17 | 3.00 | 3.00 | 3.00 | 0.83 | 0.88 | 0.81 | -0.100 | 0.014 | -0.185 | 0.546 | | 0.031 | 1.010 | <.001 | | <.001 | <.001 |
| **Emotional pain** | **C4B** | 3.05 | 3.13 | 3.01 | 3.00 | 3.00 | 3.00 | 1.04 | 1.01 | 1.06 | -0.194 | -0.004 | -0.280 | -0.234 | | 0.070 | -0.373 | <.001 | | <.001 | <.001 |
| **Difficulty moving on** | **C5A** | 2.47 | 2.47 | 2.46 | 2.00 | 2.00 | 2.00 | 1.03 | 1.10 | 1.00 | 0.399 | 0.289 | 0.487 | -0.560 | | -0.862 | -0.306 | <.001 | | <.001 | <.001 |
| **Difficulty moving on** | **C5B** | 2.70 | 2.98 | 2.54 | 3.00 | 3.00 | 3.00 | 1.28 | 1.39 | 1.20 | 0.248 | -0.011 | 0.352 | -0.960 | | -1.270 | -0.660 | <.001 | | <.001 | <.001 |
| **Emotional numbness** | **C6** | 2.34 | 2.62 | 2.18 | 2.00 | 2.00 | 2.00 | 1.16 | 1.36 | 1.01 | 0.727 | 0.311 | 0.957 | -0.162 | | -1.150 | 1.060 | <.001 | | <.001 | <.001 |
| **Meaninglessness** | **C7** | 2.71 | 2.81 | 2.65 | 3.00 | 3.00 | 3.00 | 1.06 | 1.06 | 1.07 | 0.022 | -0.178 | 0.135 | -0.465 | | -0.364 | -0.411 | <.001 | | <.001 | <.001 |
| **Loneliness** | **C8** | 2.72 | 2.89 | 2.62 | 3.00 | 3.00 | 3.00 | 1.12 | 1.17 | 1.08 | 0.470 | 0.646 | 0.332 | -0.393 | | -0.709 | -0.325 | <.001 | | <.001 | <.001 |
| **Impairment** | **D1** | 3.22 | 3.11 | 3.28 | 3.00 | 3.00 | 3.00 | 1.10 | 1.05 | 1.14 | -0.194 | -0.102 | -0.266 | -0.742 | | -0.947 | -0.627 | <.001 | | <.001 | <.001 |
| **PGA-Child (total)** | | 43.30 | 44.00 | 42.80 | 44.00 | 44.00 | 44.00 | 11.70 | 12.40 | 11.30 | -0.169 | 0.020 | -0.333 | -0.158 | | -0.401 | 0.012 | 0.09 | | 0.81 | 0.07 |

**Table A2. Principal Components Analysis of Symptoms of Prolonged Grief**

| **Component Loadings PCA** | | | | |
| --- | --- | --- | --- | --- |
|  | **Component** | | **Uniqueness** |
|  | **1.00** | **2.00** |  |
| **Meaninglessness - C7** | 0.817 |  | 0.27 |
| **Difficulty moving on - C5B** | 0.771 |  | 0.35 |
| **Loneliness - C8** | 0.769 |  | 0.37 |
| **Difficulty moving on - C5A** | 0.766 |  | 0.36 |
| **Emotional pain - C4B** | 0.684 |  | 0.46 |
| **Impairment - D1** | 0.667 | 0.531 | 0.27 |
| **Avoidance - C3** | 0.607 |  | 0.61 |
| **Emotional numbness - C6** | 0.576 | 0.429 | 0.48 |
| **Preoccupation - deceased -B2A** |  | 0.872 | 0.24 |
| **Preoccupation - manner of death - B3A** |  | 0.806 | 0.31 |
| **Yearning - B1** | 0.329 | 0.799 | 0.25 |
| **Disbelief - C2** |  | 0.693 | 0.46 |
| **Preoccupation - manner of death - B3B** |  | 0.655 | 0.50 |
| **Identity Disruption - C1** | 0.403 | 0.619 | 0.45 |
| **Emotional pain - C4A** | 0.343 | 0.571 | 0.56 |
| Note. 'varimax' rotation was used |  |  |  |

**Table A3. Eigenvalues from the Principal Components Analysis of Symptoms of Prolonged Grief**

| **Initial Eigenvalues PCA** | | | |
| --- | --- | --- | --- |
| **Component** | **Eigenvalue** | **% of Variance** | **Cumulative %** |
| 1.00 | 7.37 | 49.14 | 49.10 |
| 2.00 | 1.68 | 11.21 | 60.30 |
| 3.00 | 1.00 | 6.68 | 67.00 |
| 4.00 | 0.94 |  |  |
| 5.00 | 0.65 |  |  |
| 6.00 | 0.59 |  |  |
| 7.00 | 0.55 |  |  |
| 8.00 | 0.50 |  |  |
| 9.00 | 0.41 |  |  |
| 10.00 | 0.37 |  |  |
| 11.00 | 0.26 |  |  |
| 12.00 | 0.22 |  |  |
| 13.00 | 0.20 |  |  |
| 14.00 | 0.16 |  |  |
| 15.00 | 0.10 |  |  |

**Table A4. Scree Plot of Eigenvalues from the Principal Components Analysis of Symptoms of Prolonged Grief**

**
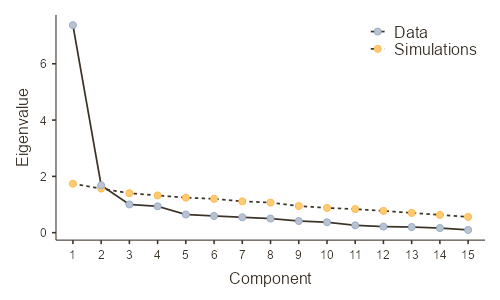
Scree plot**

**Table A5. Factor Loadings from the Exploratory Factor Analysis of Symptoms of Prolonged Grief**

| **Factor Loadings EFA** | | | | |
| --- | --- | --- | --- | --- |
|  | **Factor** | |  |
|  | **1.00** | **2.00** | **Uniqueness** |
| **Meaninglessness - C7** | 0.807 |  | 0.29 |
| **Difficulty moving on - C5B** | 0.733 |  | 0.40 |
| **Difficulty moving on - C5A** | 0.723 |  | 0.42 |
| **Loneliness - C8** | 0.719 |  | 0.44 |
| **Impairment - D1** | 0.671 | 0.513 | 0.29 |
| **Emotional pain - C4B** | 0.625 |  | 0.53 |
| **Emotional numbness - C6** | 0.547 | 0.412 | 0.53 |
| **Avoidance - C3** | 0.512 |  | 0.71 |
| **Preoccupation - deceased -B2A** |  | 0.851 | 0.27 |
| **Yearning - B1** | 0.341 | 0.788 | 0.26 |
| **Preoccupation - manner of death - B3A** |  | 0.742 | 0.39 |
| **Disbelief - C2** |  | 0.618 | 0.54 |
| **Preoccupation - manner of death - B3B** | 0.310 | 0.571 | 0.58 |
| **Identity Disruption - C1** | 0.421 | 0.564 | 0.51 |
| **Emotional pain - C4A** | 0.367 | 0.497 | 0.62 |
| *Note. 'Principal axis factoring' extraction method was used in combination with a 'varimax' rotation* | | | | |

**Table A6. Eigenvalues from the Exploratory Factor Analysis of Symptoms of Prolonged Grief**

| **Initial Eigenvalues** | | | |
| --- | --- | --- | --- |
| **Factor** | **Eigenvalue** | **% of Variance** | **Cumulative %** |
| **1.00** | 6.85 | 28.70 | 28.70 |
| **2.00** | 1.12 | 26.20 | 54.90 |
| **3.00** | 0.40 |  |  |
| **4.00** | 0.36 |  |  |
| **5.00** | 0.10 |  |  |
| **6.00** | 0.03 |  |  |
| **7.00** | 0.03 |  |  |
| **8.00** | -0.06 |  |  |
| **9.00** | -0.12 |  |  |
| **10.00** | -0.16 |  |  |
| **11.00** | -0.24 |  |  |
| **12.00** | -0.29 |  |  |
| **13.00** | -0.30 |  |  |
| **14.00** | -0.40 |  |  |
| **15.00** | -0.48 |  |  |

**Table A7. Model Fit Indices and Model Estimates for Prediction of KIDSCREEN-27**

| **Model Fit Measures** |  |  |  |  |  |  |
| --- | --- | --- | --- | --- | --- | --- |
|  |  |  | **Overall Model Test** | |  |  |
| **Model** | **R** | **R²** | **F** | **df1** | **df2** | **p** |
| 1 | 0.543 | 0.295 | 13 | 4 | 124 | <.001 |
| Note. Models estimated using sample size of N=129 | | | | | | |

| **Model Coefficients - KIDSCREEN-27, Total score** | | | | |  | |  |  |  |
| --- | --- | --- | --- | --- | --- | --- | --- | --- | --- |
|  |  |  |  |  | |  | | **95% Confidence Interval** | |
| **Predictor** | **Estimate** | **SE** | **t** | **p** | | **Stand. Estimate** | | **Lower** | **Upper** |
| **Intercept** | 132.6279 | 7.188 | 18.4511 | <.001 | |  | |  |  |
| **15 items PGA-С** | -0.69549 | 0.138 | -5.0571 | <.001 | | -0.46337 | | -0.645 | -0.282 |
| **RCADS25 – anxiety** | -0.00314 | 0.115 | -0.0274 | 0.978 | | -0.00311 | | -0.228 | 0.2221 |
| **RCADS25 - depression** | -0.06174 | 0.138 | -0.4459 | 0.656 | | -0.05378 | | -0.293 | 0.185 |
| **CRIES-8** | -0.32852 | 0.313 | -1.0499 | 0.296 | | -0.09188 | | -0.265 | 0.0813 |
